# Supplementary material for: Kiwifruit SVP2 gene prevents premature budbreak during dormancy
Source: PubMed Central journal article supplement (PMC5853213; doi:10.1093/jxb/erx014), 2017-02-03

Fig. S1

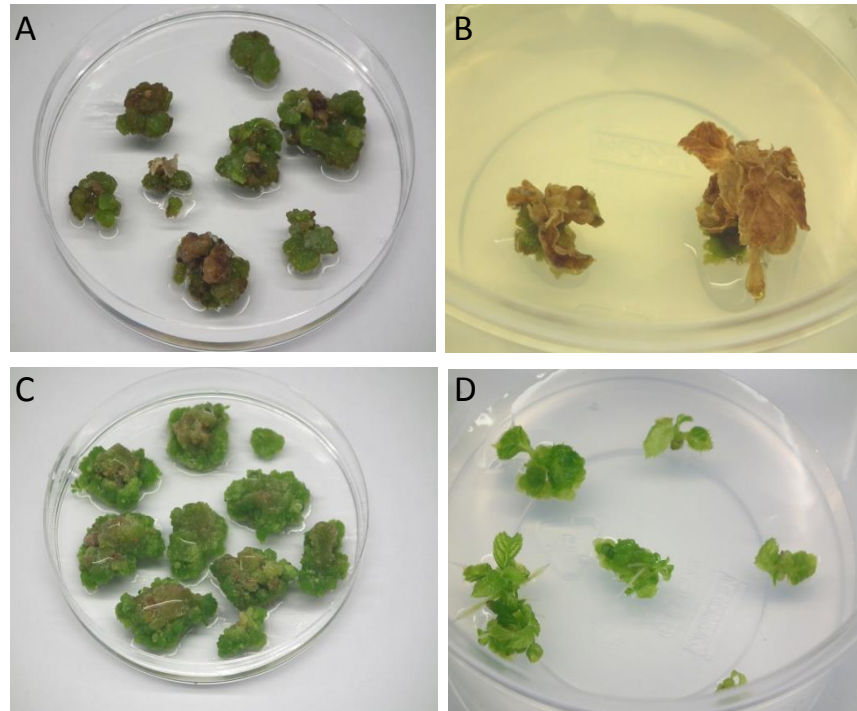

**Fig. S1** Transformation of *Actinidia eriantha*. (A) Browning of adventitious *SVP2* shoots on a standard regeneration medium. (B) Shoot tip die-back on a standard elongation medium. (C) Healthy *SVP2* callus with adventitious buds on modified regeneration medium. (D) Healthy transgenic shoots produced on modified elongation medium.

Fig. S2

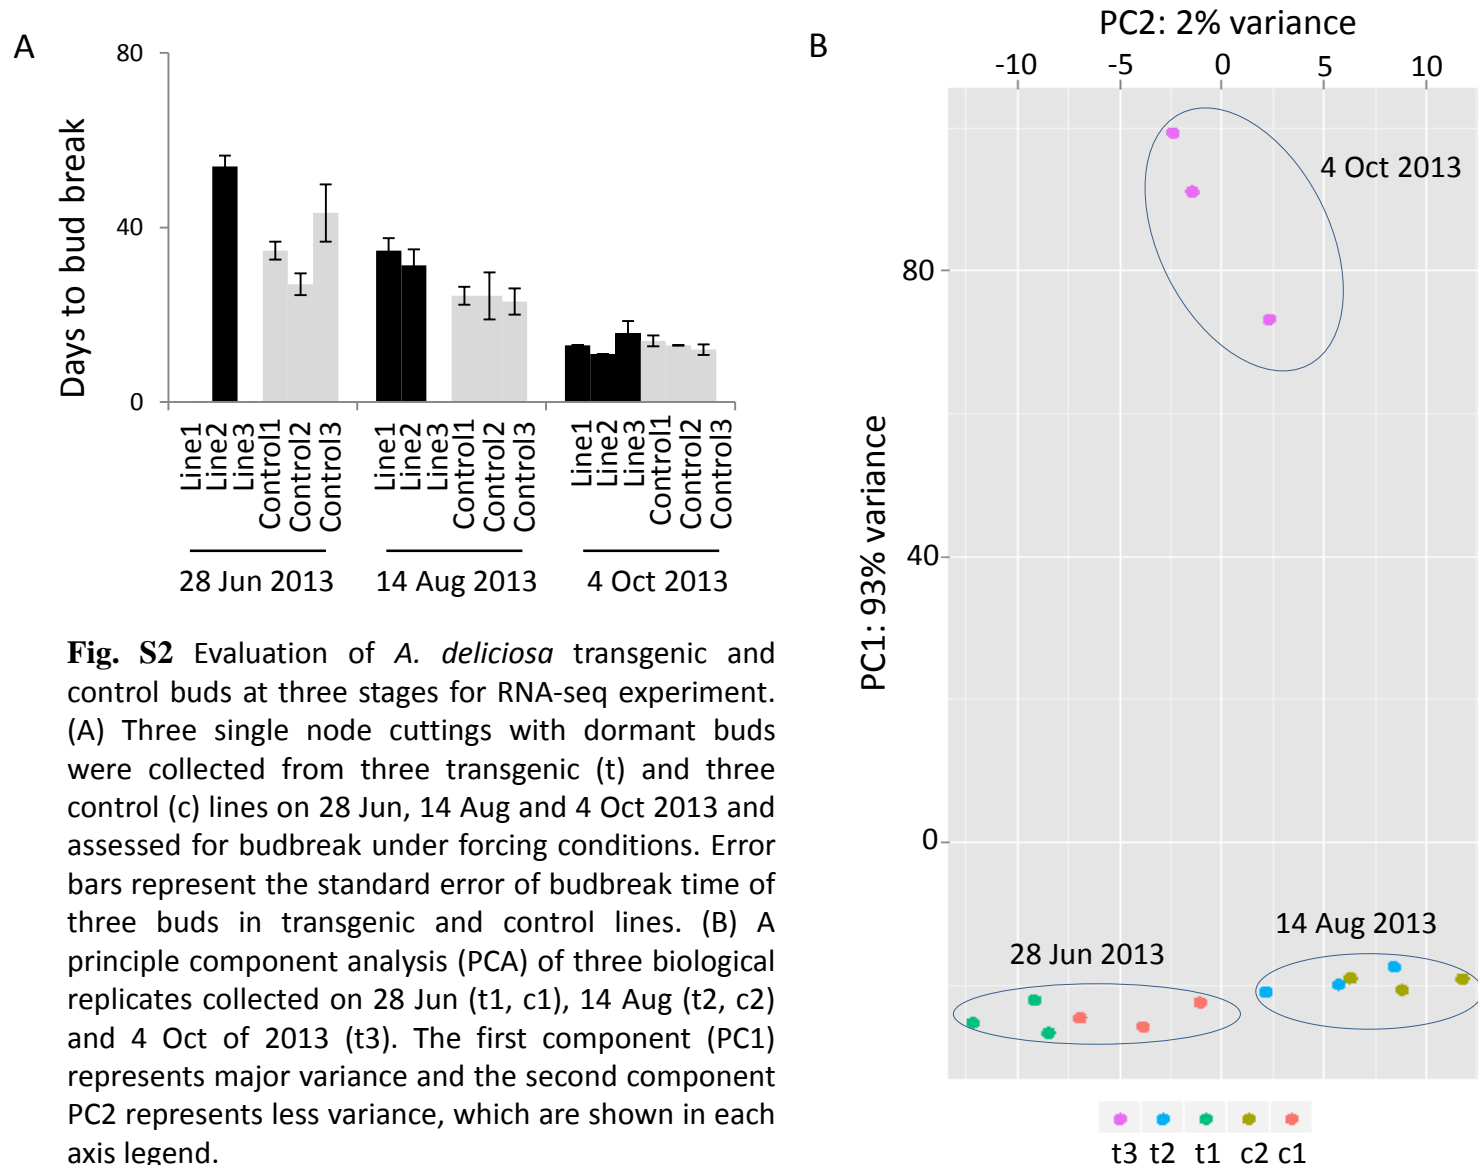

**Fig. S2** Evaluation of *A. deliciosa* transgenic and control buds at three stages for RNA-seq experiment. (A) Three single node cuttings with dormant buds were collected from three transgenic (t) and three control (c) lines on 28 Jun, 14 Aug and 4 Oct 2013 and assessed for budbreak under forcing conditions. Error bars represent the standard error of budbreak time of three buds in transgenic and control lines. (B) A principle component analysis (PCA) of three biological replicates collected on 28 Jun (t1, c1), 14 Aug (t2, c2) and 4 Oct of 2013 (t3). The first component (PC1) represents major variance and the second component PC2 represents less variance, which are shown in each axis legend.

Fig. S3

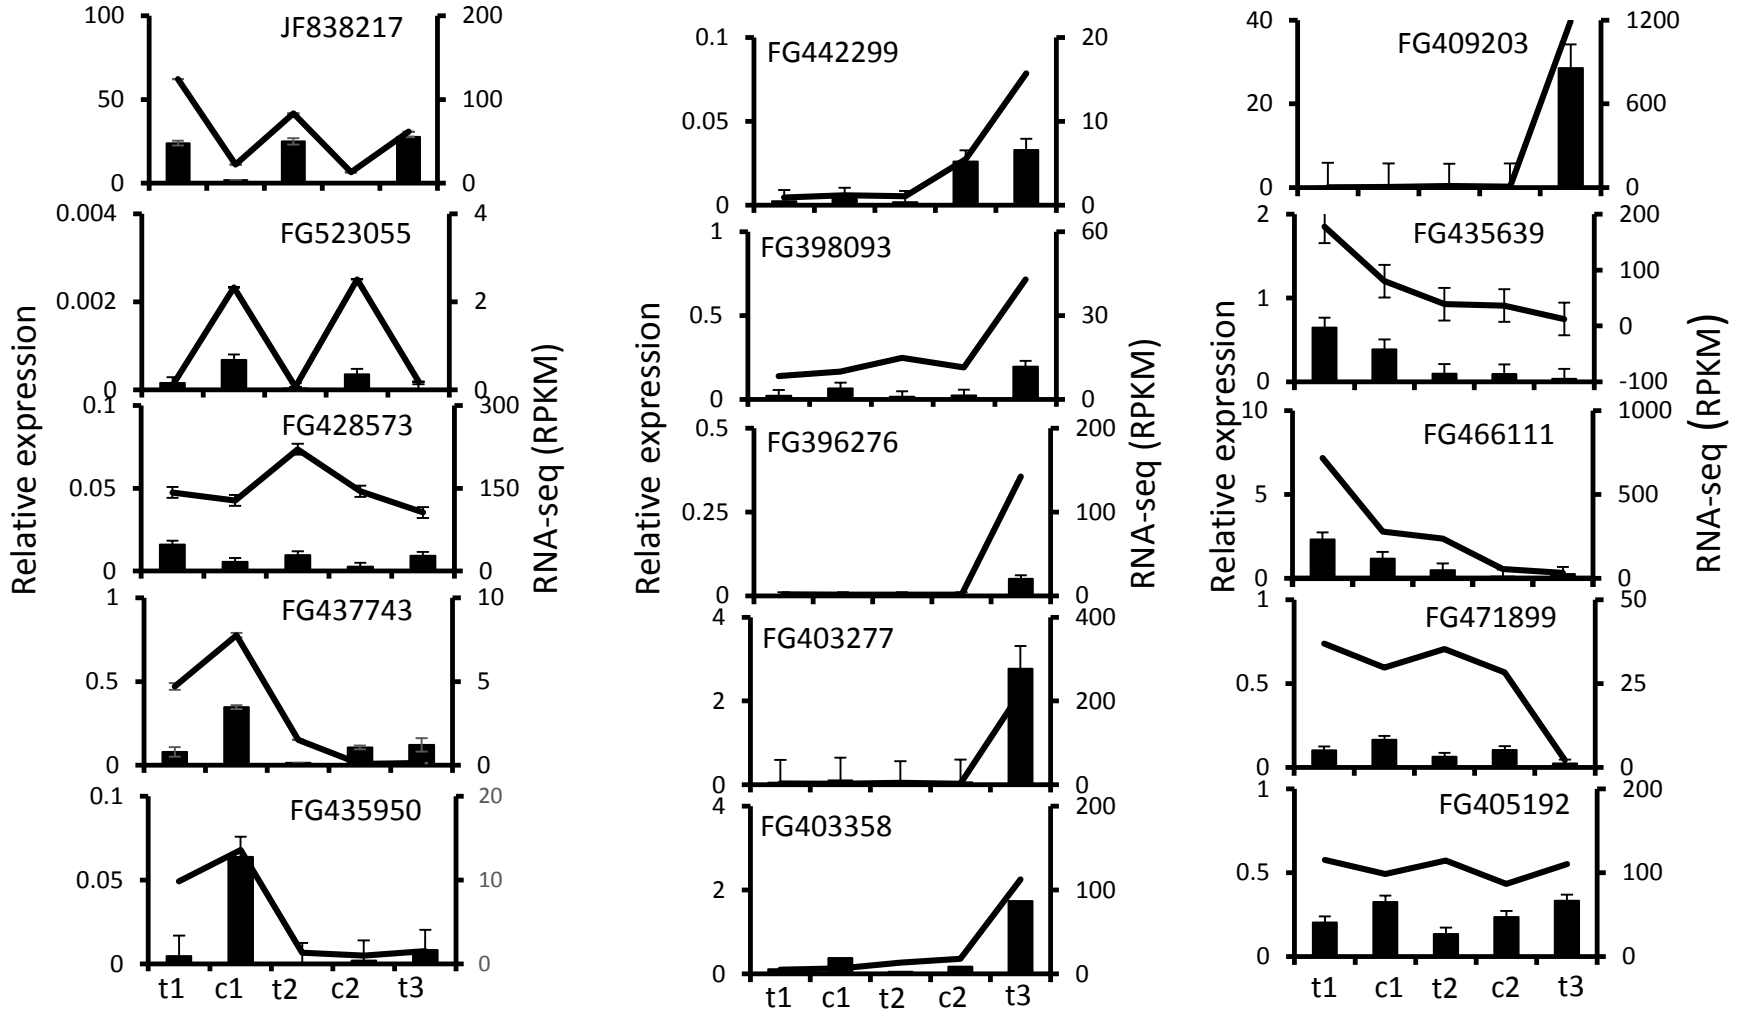

**Fig. S3** qPCR validation of RNA-seq expression profiles. 15 genes were randomly selected from differentially expressed genes in c1, c2, t1, t2 and t3. The left y-axis indicates relative gene expression levels determined by qPCR. Error bars represent the standard error for four replicate reactions. The right y-axis indicates gene expression levels calculated by the RPKM method.

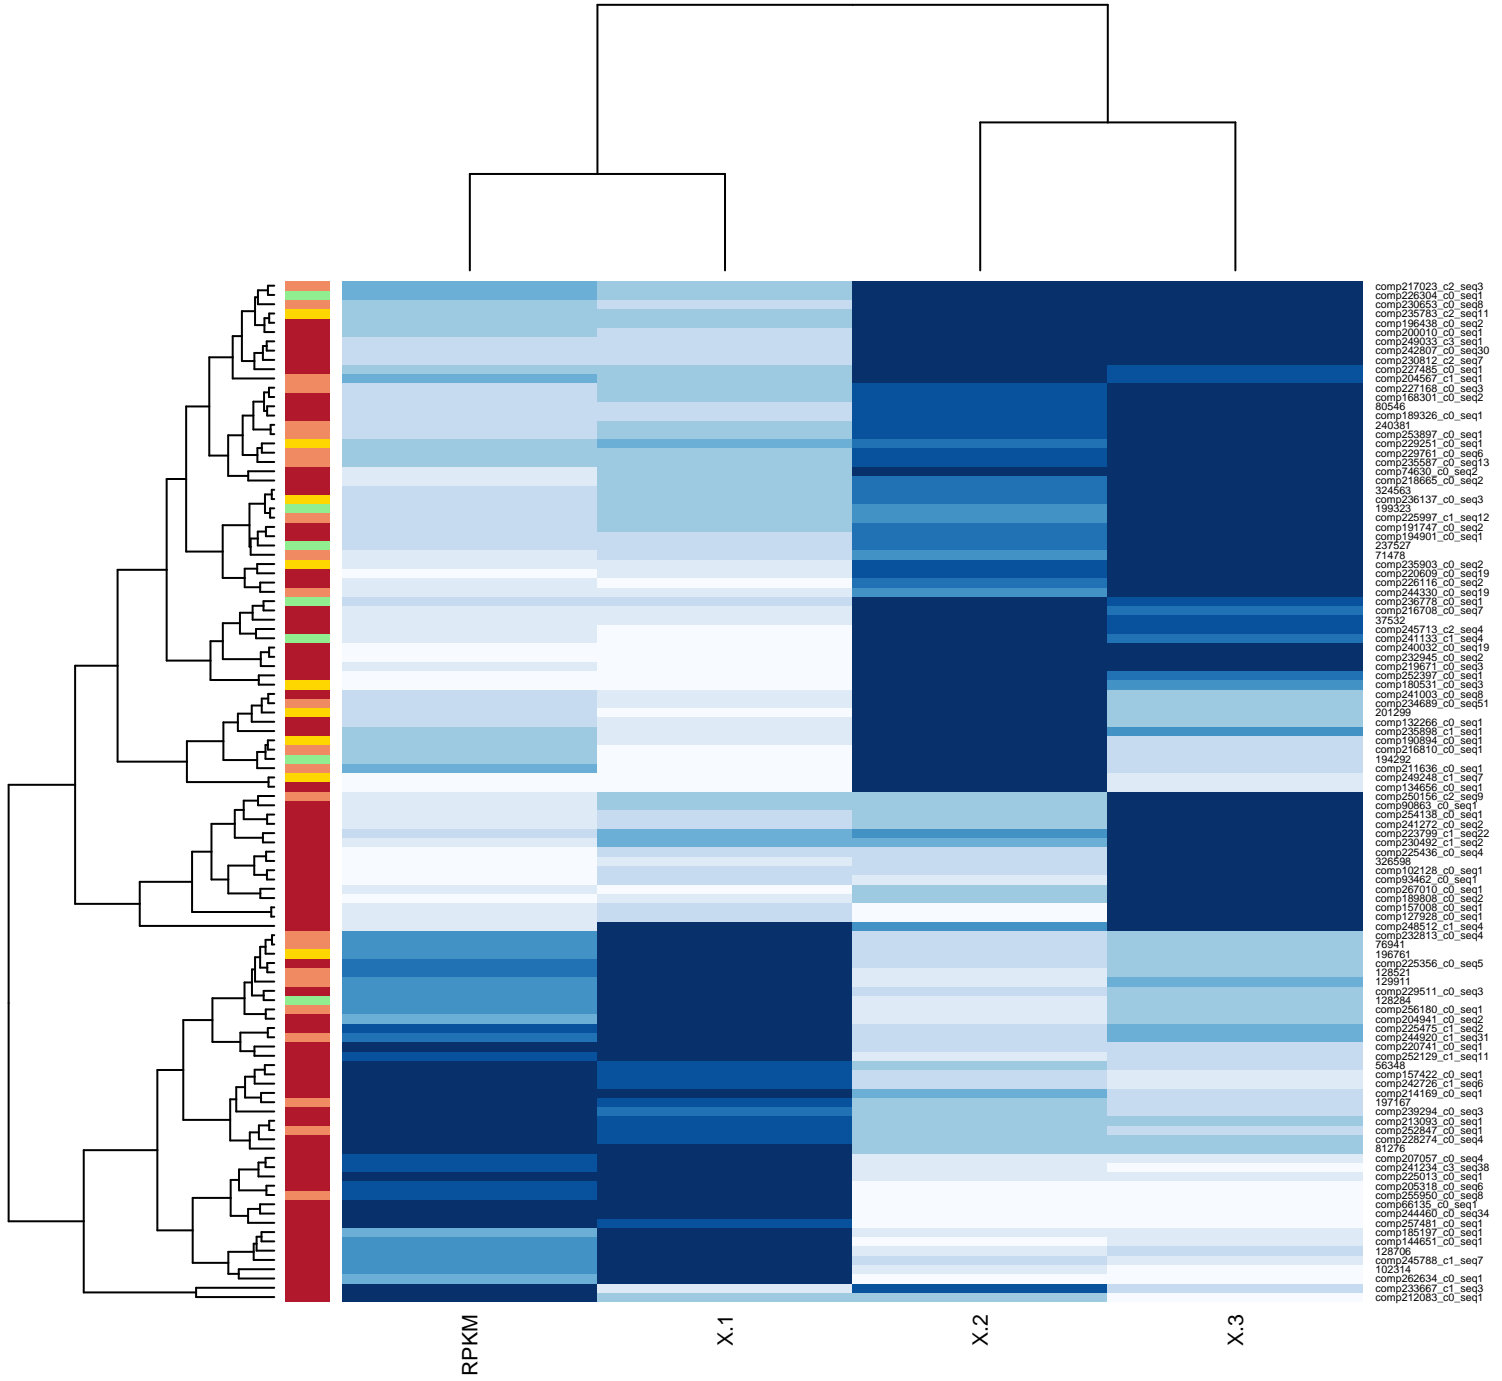

Supplement: erx014_suppl_supplementary_figures_s1_s4.pdf [file erx014_suppl_supplementary_figures_s1_s4.pdf]
